# Supplementary material
Source: PubMed Central journal article supplement (PMC3675237)
Supplement: mmc1.pdf [file mmc1.pdf]

## **Supplemental Data**

### **Mutations in *BICD2*, which Encodes a Golgin and Important Motor Adaptor, Cause Congenital Autosomal-Dominant Spinal Muscular Atrophy**

Kornelia Neveling, Lilian A. Martinez-Carrera, Irmgard Hölker, Angeliën Heister, Aad Verrips, Seyyed Mohsen Hosseini-Barkooie, Christian Gilissen, Sascha Vermeer, Maartje Pennings, Rowdy Meijer, Margot te Riele, Catharina J.M. Frijns, Oksana Suchowersky, Linda MacLaren, Sabine Rudnik-Schöneborn, Richard J. Sinke, Klaus Zerres, R. Brian Lowry, Henny H. Lemmink, Lutz Garbes, Joris A. Veltman, Helenius J. Schelhaas, Hans Scheffer, and Brunhilde Wirth

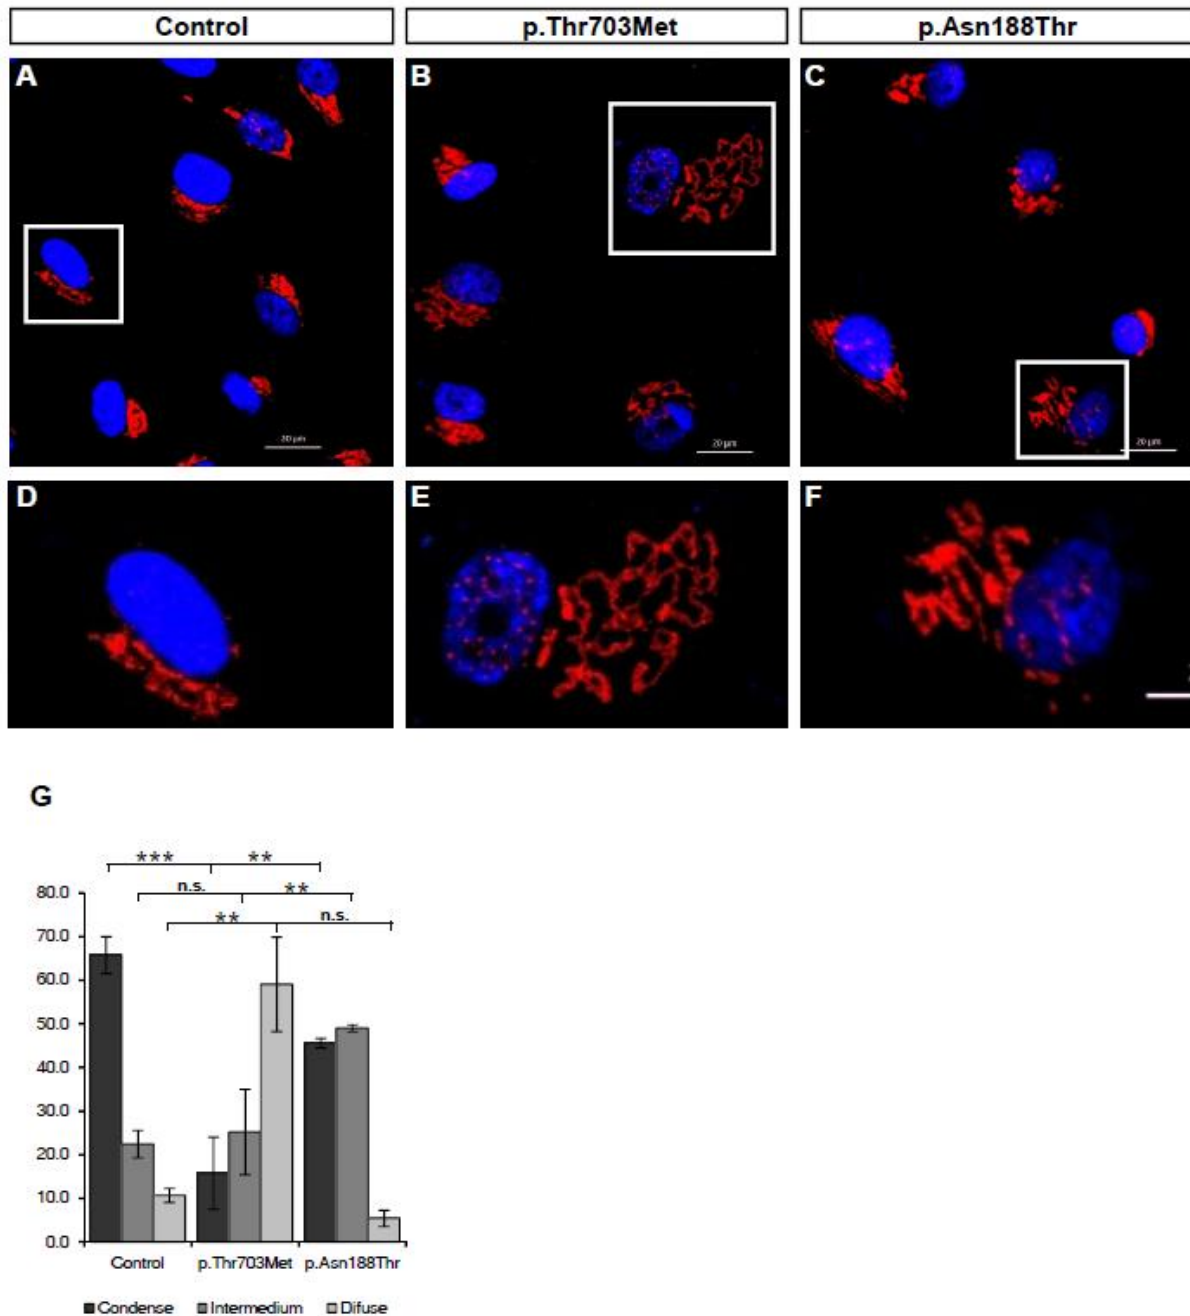

**Figure S1. Mutations in *BICD2* Cause Severe Golgi Fragmentation in Primary Fibroblast Cells**

(A–C) Golgi apparatus of control fibroblasts and patients fibroblasts immunostained with antibody against the trans-Golgi marker MG160 (0.0025 mg/ml, Abcam); DNA (blue) is stained with DAPI.

(D–F) Magnified insets of (A–C).

(G) Quantification of Golgi structure defined as condense, intermedium and diffuse in 90 cells of each cell line were counted in three independent experiments and given as mean  $\pm$  SD. Each quantification was done blindly by two independent persons. Statistical significance is given between controls and each of the two cell lines as \*\*\*  $p < 0.001$ ; \*\*  $p < 0.01$ , \* $p < 0.05$ , n. s. = not significant.

**Table S1. Filtering of Annotated Variants**

|                                   |        |
|-----------------------------------|--------|
| Total variants                    | 27,190 |
| variants on chromosome 9          | 1046   |
| no known SNPs                     | 118    |
| located in exon or splice site    | 29     |
| non-synonymous                    | 23     |
| not seen before in other projects | 5      |

**Table S2. Detailed Information of Remaining Five Candidate Variants**

| Chr  | Position  | Ref | Mut | Reads | Var Reads | % Var Reads | Gene           | Ref AA         | Mut AA         | PhyloP |
|------|-----------|-----|-----|-------|-----------|-------------|----------------|----------------|----------------|--------|
| chr9 | 21007123  | T   | G   | 60    | 39        | 65          | <i>PTPLAD2</i> | - <sup>1</sup> | - <sup>1</sup> | -3.18  |
| chr9 | 34514466  | G   | A   | 146   | 62        | 43          | <i>DNAI1</i>   | W              | *              | 5.39   |
| chr9 | 37707448  | A   | T   | 75    | 29        | 39          | <i>FRMPD1</i>  | N              | I              | -0.11  |
| chr9 | 95491439  | G   | A   | 56    | 25        | 45          | <i>BICD2</i>   | S              | L              | 3.65   |
| chr9 | 125621277 | T   | C   | 100   | 56        | 56          | <i>RC3H2</i>   | M              | V              | 2.39   |

Chr: chromosome on which the nucleotide change is detected, Position: genomic position at which the nucleotide change is detected, Ref: reference nucleotide at the respective position, Mut: substitution of the nucleotide at the respective position, Read: total number of reads at the respective position, Var reads: number of reads showing the nucleotide substitution, % Var reads: Percentage of reads showing the nucleotide substitution, Gene: Gene in which the nucleotide change is detected, Ref AA: reference amino acid at the respective position, Mut AA: substitution of amino acid resulting from detected nucleotide change, PhyloP: phyloP conservation score for evolutionary conservation. <sup>1</sup>:This variant is located within a splice site, therefore no amino acid is given here.

**Table S3. Identified *BICD2* Mutations**

| Family | Origin   | Number of Patients/<br>Family | gDNA          | cDNA      | Protein     | rs Number  | PhyloP Score | SIFT        | PolyPhen Score            |
|--------|----------|-------------------------------|---------------|-----------|-------------|------------|--------------|-------------|---------------------------|
| 1      | Dutch    | 7                             | g.95491439C>T | c.320 C>T | p.Ser107Leu | -          | 3.65         | deleterious | probably damaging<br>0,99 |
| 2      | Canadian | 2                             | g.95480229C>T | c.2108C>T | p.Thr703Met | -          | 5.49         | deleterious | probably damaging<br>1.00 |
| 3      | Dutch    | 5                             | g.95484981A>C | c.563A>C  | p.Asn188Thr | -          | 4.25         | deleterious | probably damaging<br>0,99 |
| 4      | German   | 2                             | g.95491490A>G | c.269A>G  | p.Lys90Arg  | rs61754130 | 1.42         | tolerated   | benign<br>0.002           |
| 5      | German   | 5                             | g.95491490A>G | c.269A>G  | p.Lys90Arg  | rs61754130 | 1.42         | tolerated   | benign<br>0.002           |

Family: numbering of the investigated families, Origin: nationalities of the respective families, gDNA: genomic position of detected variant in *BICD2*, cDNA: cDNA position of detected variant in *BICD2*, Protein: detected mutation on protein level, rs number: SNP number as given by dbSNP database, SIFT/PolyPhen: Prediction programs used for determination of pathogenicity, PhyloP: PhyloP conservation score for evolutionary conservation.
